1 **Avian thermoregulation in the heat: phylogenetic variation among avian orders in**  
2 **evaporative cooling capacity and heat tolerance**

3 **Running title:** Phylogenetic variation in avian heat tolerance

4  
5 Ben Smit<sup>1,\*</sup>

6 Maxine C. Whitfield<sup>2</sup>

7 William A. Talbot<sup>3</sup>

8 Alexander R. Gerson<sup>4</sup>

9 Andrew E. McKechnie<sup>2,5</sup>

10 Blair O. Wolf<sup>3</sup>

11 <sup>1</sup>Department of Zoology and Entomology, Rhodes University, P.O. Box 94 Grahamstown  
12 6040, South Africa

13 <sup>2</sup>DST-NRF Centre of Excellence at the Percy FitzPatrick Institute, Department of Zoology  
14 and Entomology, University of Pretoria, Private Bag X20, Hatfield 0028, South Africa

15 <sup>3</sup>UNM Biology Department, University of New Mexico, MSC03-2020, Albuquerque, NM  
16 87131-0001, USA

17 <sup>4</sup>Department of Biology, University of Massachusetts, Amherst, MA 01003, USA

18 <sup>5</sup>South African Research Chair in Conservation Physiology, National Zoological Gardens of  
19 South Africa, P.O. Box 754, Pretoria 0001, South Africa

20 \*Author for correspondence (b.smit@ru.ac.za)

21

22 **Keywords:** evaporative heat loss, heat dissipation, upper critical limits of thermoneutrality,  
23 panting, gular flutter

24

25

26 **Summary statement**

27 We show that avian evaporative cooling efficiency and heat tolerance display substantial  
28 taxonomic variation that are, unexpectedly, not systematically related to the use of panting  
29 versus gular flutter processes.

30

31

32

33

34

35 **Abstract**

36 Little is known about the phylogenetic variation of avian evaporative cooling efficiency and  
37 heat tolerance in hot environments. We quantified thermoregulatory responses to high air  
38 temperature ( $T_a$ ) in ~100-g representatives of three orders: African cuckoo (*Cuculus gularis*,  
39 Cuculiformes), lilac-breasted roller (*Coracias caudatus*, Coraciiformes), and Burchell's  
40 starling (*Lamprotornis australis*, Passeriformes). All three species initiated respiratory  
41 mechanisms to increase evaporative heat dissipation when body temperature ( $T_b$ ) approached  
42 41.5°C in response to increasing  $T_a$ , with gular flutter observed in cuckoos and panting in  
43 rollers and starlings. Resting metabolic rate (RMR) and evaporative water loss (EWL)  
44 increased by quantitatively similar magnitudes in all three species, although maximum rates  
45 of EWL were proportionately lower in starlings. Evaporative cooling efficiency [defined as  
46 the ratio of evaporative heat loss (EHL) to metabolic heat production (MHP)] generally  
47 remained below 2.0 in cuckoos and starlings, but reached a maximum of ~3.5 in rollers. The  
48 high value for rollers reveals a very efficient evaporative cooling mechanism, and is similar  
49 to EHL/MHP maxima for similarly sized columbids which very effectively dissipate heat via  
50 cutaneous evaporation. This unexpected phylogenetic variation among the orders tested in the  
51 physiological mechanisms of heat dissipation is an important step toward determining the  
52 evolution of heat tolerance traits in desert birds.

53

54

55

56

57

58

59

60

61

62

63

64

65

66

67

68

69 **Introduction**

70 Evaporative heat loss (EHL) is the only mechanism whereby birds can maintain body  
71 temperature ( $T_b$ ) below lethal limits in hot environments where environmental temperature  
72 exceeds  $T_b$ . Rapid increases in evaporative water loss (EWL) are a ubiquitous avian response  
73 to such conditions (Bartholomew and Cade, 1963; Dawson and Bartholomew, 1968; Smith et  
74 al., 2015; Whitfield et al., 2015). Water requirements for thermoregulation have thus shaped  
75 the ecology and evolution of birds living in hot environments, and provide the basis for  
76 important trade-offs between dehydration and hyperthermia avoidance in arid-zone species  
77 (Smit et al., 2013; Tieleman and Williams, 2000; Tieleman and Williams, 2002; Tieleman et  
78 al., 2003).

79 Avian heat tolerance and evaporative cooling efficiency (quantified as the maximum  
80 ratio of heat dissipated evaporatively, EHL, to that generated metabolically, MHP) appears to  
81 vary substantially among orders (Lasiewski and Seymour, 1972; Smith et al., 2015), within  
82 orders (McKechnie et al., 2016a; McKechnie et al., 2017), and even within species (Noakes  
83 et al., 2016). For example, recent studies have shown that the efficiency of evaporative  
84 cooling is generally very high (EHL/MHP > 2.0) in members of the orders Columbiformes  
85 and Caprimulgiformes (McKechnie et al., 2016a; O'Connor et al., 2017; Smith et al., 2015;  
86 Talbot et al., 2017) , but less so in Passeriformes, Pteroclidiformes, Galliformes and  
87 Strigiformes, where efficiency rarely exceeds 2.0 (Bartholomew et al., 1968; McKechnie et  
88 al., 2016b; McKechnie et al., 2017; Smith et al., 2015; Smith et al., 2017; Whitfield et al.,  
89 2015). Narrow phylogenetic sampling means we still have an incomplete understanding of  
90 the diversity of avian EHL mechanisms and their functional significance for heat tolerance.

91 Body mass represents one of the most prominent sources of variation in heat  
92 tolerance and the efficiency of EHL (McKechnie and Wolf, 2010), but even species of similar  
93 size can still show substantial variation. For example, Lasiewski and Seymore (1972) showed  
94 that four similarly-sized species from different orders (*Ploceus cucullatus*, Passeriformes;  
95 *Excalfactoria chinensis*, Galliformes; *Scardafella inca*, Columbiformes; *Phalaenoptilus*  
96 *nuttallii*, Caprimulgiformes) show substantial variation in terms of the magnitude of  
97 elevations in  $T_b$ , metabolism, EWL, and EHL/MHP during heat exposure. Recent studies  
98 have suggested that some of the mechanisms underlying this variation may include  
99 differential reliance on respiratory versus cutaneous pathways of evaporative cooling  
100 (McKechnie et al., 2016a), and morphological variation (e.g. bill size) (Danner et al., 2016;  
101 Tattersall et al., 2009; van de Ven et al., 2016). Species relying on cutaneous evaporative  
102 pathways, such as Columbiformes, are thought to show negligible metabolic heat production

103 associated with evaporative cooling demands (McKechnie et al., 2016a). In contrast, species  
104 relying on respiratory evaporative cooling (especially panting) may incur greater metabolic  
105 costs in their efforts to dissipate heat (Bartholomew et al., 1968; Lasiewski and Seymour,  
106 1972). Gular flutter (gaping while pulsating the hyoid bone to ventilate the buccal cavity) has  
107 been argued to require less energy than panting (gaping while using rapid movements of the  
108 thorax and abdominal cavities) (Bartholomew et al., 1962; Dawson, 1958; Lasiewski and  
109 Bartholomew, 1966); the gular flutter process may thus enhance efficiency of EHL. The use  
110 of gular flutter *versus* panting further seems to vary among taxa (Calder and Schmidt-  
111 Nielsen, 1967), but the phylogenetic distribution of these evaporative cooling processes  
112 remains poorly understood.

113 Variation in the rate and efficiency of evaporative cooling may reflect physiological  
114 costs, such as risk of dehydration and hyperthermia (McKechnie and Wolf, 2010), but may  
115 also reflect behavioural [e.g. reduced foraging efficiency correlated with heat dissipation  
116 efforts (du Plessis et al., 2012)] and ecological costs [e.g. reliance of surface water sources  
117 (Smit et al., 2016)]. Thus far, evaporative cooling efficiency and heat tolerance are best-  
118 studied in the Passeriformes and Columbiformes, and data from more under-represented  
119 orders are needed to further our understanding of the evolutionary drivers and mechanisms  
120 involved in thermoregulation in the heat.

121 Here we present data on thermoregulation under very hot conditions in three 100-g  
122 species from three orders: Cuculiformes, Coraciiformes and Passeriformes. The Cuculiformes  
123 and Coraciiformes remain largely unstudied in terms of thermoregulation at high  
124 environmental temperatures; both represent diverse taxa that include many species occupying  
125 hot, arid regions. To the best of our knowledge, the only thermoregulatory data from a  
126 cuculiform under hot conditions is for the roadrunner, *Geococcyx californianus* (Calder and  
127 Schmidt-Nielsen, 1967). In the latter study, high chamber humidity may have reduced the  
128 efficiency of EHL at air temperatures ( $T_a$ ) below  $T_b$  (Gerson et al., 2014). Recent advances in  
129 carbon dioxide and water analysers have allowed us to maintain low humidity levels during  
130 testing by using very high flow rates, thus avoiding the complications associated with high  
131 humidity that plagued early studies (Gerson et al., 2014; Lasiewski et al., 1966; Smith et al.,  
132 2015; Whitfield et al., 2015). We further describe the mechanism of respiratory EHL  
133 (panting or gular flutter) used by these three species, and predict that, compared to panting,  
134 the use of gular flutter is strongly associated with improved evaporative cooling efficiency  
135 and heat tolerance. In addition, our inclusion of a large passerine (>100 g) allows for more

136 rigorous analyses of the scaling of traits related to heat tolerance and evaporative cooling in  
137 this speciose taxon (McKechnie et al., 2017).

138

## 139 **Methods**

### 140 *Study species and study sites*

141 We measured resting metabolic rate (RMR), evaporative water loss (EWL), and  $T_b$  in species  
142 representing three avian orders in the southern Kalahari Desert in the Northern Cape province  
143 of South Africa, an arid area with a mean annual rainfall of ~200 mm and summer daily  
144 maximum  $T_a$  ranging from ~20–43°C (Whitfield et al., 2015). We followed the methodology  
145 of Whitfield et al. (2015) to quantify thermoregulatory responses to high  $T_a$  in a field  
146 laboratory from January to April 2012 at Wildsgenot Game Ranch (27°04'S, 21°23'E), and  
147 from January to March 2013 at Leeupan Game Ranch (26°58'S, 21°50'E).

148 We trapped six African cuckoos (*Cuculus gularis* Stephens; order Cuculiformes,  
149 hereafter cuckoos) with a mean  $\pm$  s.d. body mass ( $M_b$ ) of  $109.6 \pm 5.6$  g (range 99.0 - 116.0 g)  
150 at Leeupan Game Ranch during early 2013 (austral summer) using mist nets. We trapped 10  
151 lilac-breasted rollers (*Coracias caudatus* Linnaeus; Order Coraciiformes, hereafter rollers)  
152 with a  $M_b$  of  $95.4 \pm 8.5$  g (78.2 - 110.35 g); two individuals were trapped in February 2012 at  
153 Wildsgenot Game Ranch, and the remaining individuals were trapped at Leeupan Game  
154 Ranch between January 2013 and March 2013. We trapped seven Burchell's starlings  
155 (*Lamprolornis australis* Smith; order Passeriformes, hereafter starlings) with a  $M_b$  of  $109.1 \pm$   
156  $9.3$  g (85.4 - 116.9 g) using mist nets and/or flap traps baited with tenebrionid beetle larvae  
157 on Wildsgenot Game Ranch in February 2012, and Leeupan Game Ranch from December  
158 2013 to February 2013. Measurements were carried out on the same day of capture. If birds  
159 were not tested within the first three hours after being trapped, they were housed in cages  
160 constructed of shade-cloth, and were provided with tenebrionid beetle larvae and water ad  
161 libitum, until physiological measurements commenced.

162 Birds were held in respirometry chambers for 2-3 hr, a period that typically limited  
163  $M_b$  loss to <5% of initial  $M_b$  (mean  $M_b$  loss during measurements was  $4.0 \pm 1.8\%$  of initial  
164 values) and time in captivity did not exceed 24 hr, after which birds were released at the site  
165 of capture following Whitfield et al. (2015). All experimental procedures were approved by  
166 the Animal Ethics Committee of the University of Pretoria (protocol EC071-11) and the  
167 Institutional Animal Care and Use Committee of the University of New Mexico (12-  
168 1005370-MCC). A permit to trap the birds was issued by the Northern Cape Department of  
169 Environmental Affairs (ODB 008/2013).

170

171 *Gas exchange and temperature measurements*

172 We used the same experimental set-up as described by Whitfield et al. (2015) to obtain gas  
173 exchange,  $T_a$  and  $T_b$  measurements. We measured  $T_b$  using calibrated temperature-sensitive  
174 passive integrated transponder (PIT) tags (Biomark, Boise, ID, USA) which were injected  
175 intraperitoneally into the abdominal cavity of each bird shortly after capture. We monitored  
176  $T_b$  throughout gas exchange measurements, using a reader and transceiver system (model  
177 FS2001, Biomark, Boise, ID, USA). We obtained carbon dioxide production ( $\dot{V}_{CO_2}$ ) and  
178 EWL measurements over the  $T_a$  range of 25-56°C (depending on the species), also using the  
179 same experimental setup as described by Whitfield et al. (2015). All three species were  
180 placed individually in 9-L plastic chambers, and stood on a platform of plastic mesh 10 cm  
181 above a 1-cm layer of mineral oil to trap excreta. We used flow rates between 9 and 30 L  
182  $\text{min}^{-1}$  for cuckoos; 9 and 70 L  $\text{min}^{-1}$  for rollers, and 10 and 55 L  $\text{min}^{-1}$  for starlings, depending  
183 on the experimental  $T_a$ , in order to keep chamber humidity below 5 ppt. As was the case in  
184 previous studies using the same methodology (Smith et al. 2015, Whitfield et al. 2015,  
185 McKechnie et al. 2016a, McKechnie et al. 2016b), birds remained calmer at very high  $T_a$   
186 when we increased flow rate (and hence decreased humidity).

187

188 *Experimental protocol*

189 Following the protocol described by Whitfield et al. (2015), we exposed birds to  
190 progressively higher  $T_a$ , with increments of approximately 5°C between 25 and 40°C, and  
191 2°C increments between 40°C and the maximum  $T_a$  (ranging from 48 to 56°C depending on  
192 the species). Tests were conducted during the day, as this was the active phase of all three  
193 species. Birds spent between 10 and 30 min at each  $T_a$  value. We continually monitored birds  
194 during measurements using a live video feed and an infrared light source (Whitfield et al.,  
195 2015). We recorded behavioural responses of birds within the respirometry chambers every  
196 two minutes; an activity state score of the individual (e.g. calm, turning around or jumping)  
197 was recorded, as well as respiratory EHL mechanisms, including panting (defined as gaping)  
198 and gular flutter (defined as an obvious pulsation of hyoid bone in the gular area while  
199 gaping). For each individual, we recorded the air temperature and body temperature at which  
200 heat dissipation behaviour was initiated.

201 We followed Whitfield et al. (2015) in terminating test runs when a bird a) exhibited  
202 prolonged escape behaviour such as agitated jumping, pecking and/or wing flapping), b)

203 showed signs of a loss of coordination or balance accompanied by  $T_b > 44^\circ\text{C}$ , or c) exhibited  
204 a decrease in EWL and RMR accompanied by an uncontrolled increase in  $T_b$ . In the last  
205 instance, a bird was considered to have reached its upper limit of heat tolerance, and the  $T_a$   
206 associated with the onset of these signs of heat stress was considered the thermal endpoint for  
207 that individual. When a bird reached any the conditions described above, we removed the  
208 individual from the chamber by hand, gently rubbed a cotton pad soaked in ethanol onto its  
209 body, and held it in front of an air-conditioner producing chilled air in order to facilitate rapid  
210 heat loss (Whitfield et al., 2015).

211

### 212 *Data analyses*

213 Data were analysed following Whitfield et al. (2015). We calculated physiological estimates  
214 by extracting, EWL and  $T_b$  as the lowest 5 min mean at each  $T_a$  using Expedata (Sable  
215 Systems, Las Vegas NV, USA). We present whole-animal values, although we also  
216 calculated the slope of mass-specific EWL vs.  $T_a$  to compare our values with the allometric  
217 equation presented by McKechnie and Wolf (2010). We followed McKechnie et al. (2017) by  
218 converting rates of EWL to evaporative heat loss (W) assuming a latent heat of vaporisation  
219 of water of  $2.406 \text{ J mg}^{-1}$  at  $40^\circ\text{C}$  (Tracy et al., 2010). Since none of our study species have  
220 crops we assumed all birds were post-absorptive at the time of measurements, but we were  
221 unable to confirm this. Measurements typically took place more than 1 hr after capture, and  
222 food (mealworm larvae) was only offered to individuals not tested within 3 hrs of capture.  
223 We therefore assumed a respiratory exchange ratio of 0.85, representative of a mix of  
224 carbohydrate and lipid metabolism in post-absorptive birds (Walsberg and Wolf 1995), and  
225 converted rates of  $\dot{V}_{\text{CO}_2}$  to metabolic rate (Watt, W) using  $24.4 \text{ J mL}^{-1} \text{ CO}_2$  (Withers 1992).

226 We used segmented linear regression models fitted in the *R* package *segmented*  
227 (Muggeo, 2009) to estimate inflection  $T_a$  in the physiological data. Although our use of these  
228 models violates assumptions of independent samples, we used segmented models purely to  
229 aid us in identifying inflection  $T_a$  values in physiological variables. We subsequently used  
230 linear mixed effects models that included individual identity as a random factor in the *R*  
231 package *nlme* (Pinheiro et al., 2009), to obtain estimates of physiological variables as a  
232 function of  $T_a$ , using subsets of the data above respective inflection  $T_a$ . We contrasted the  
233 slopes of physiological parameters obtained from these mixed effects models among species,  
234 by including data previously collected from laughing doves (*Stigmatopelia senegalensis*,  $89.4$   
235  $\pm 13.0$  g, hereafter doves) studied at the same time and site as our species (McKechnie et al.,

236 2016a), and freckled nightjars (*Caprimulgus tristigma*,  $64.7 \pm 6.3$  g, hereafter nightjars)  
237 studied from a desert site in Namaqualand, South Africa (O'Connor et al., 2017).  
238 Thermoregulatory data in the doves and nightjars were collected in the same manner as  
239 described here, although we recalculated physiological estimates of  $\dot{V}_{CO_2}$ , EWL and  $T_b$  in the  
240 dove, as the lowest 5 min mean at each  $T_a$ , to facilitate comparison with our study species and  
241 the nightjar. Our small sample size of species prevented us from conducting more rigorous  
242 statistical analyses that test phylogenetic inertia and, if necessary, account for phylogenetic  
243 relatedness. We calculated the upper and lower 95% confidence limits (CL) of each  
244 coefficient, and considered species to differ quantitatively in the parameters when there was  
245 no overlap in the 95% CL.

246

## 247 **Results**

### 248 *Body temperature*

249 The  $T_b$  measured at  $T_a$ s below the respective  $T_{uc}$  of each species varied by  $0.7^\circ\text{C}$ , from a mean  
250 of  $40.0 \pm 0.6^\circ\text{C}$  in cuckoos to  $40.7 \pm 0.8^\circ\text{C}$  in rollers (Table 1). The inflection of  $T_a$  above  
251 which  $T_b$  increased was  $< 37^\circ\text{C}$  in all three species (Table 1), with  $T_b$  increasing linearly and  
252 significantly above the inflection  $T_a$ s (cuckoo,  $t_{1,26}=14.275$ ,  $p<0.001$ ; rollers,  $t_{1,56}= 12.10$ ,  
253  $p<0.001$ ; starlings,  $t_{1,28}=7.71$ ,  $p<0.001$ ) (Fig. 1). The maximum  $T_a$  reached was  $50^\circ\text{C}$  for both  
254 cuckoos and starlings, and  $56^\circ\text{C}$  for rollers. Any further increases in  $T_a$  resulted in these  
255 individuals becoming severely agitated. Average maximum  $T_b$  ranged between  $42.8^\circ$  and  
256  $44.0^\circ\text{C}$  in the three species at the highest  $T_a$ s tested. In two calm cuckoos,  $T_b$  exceeded  $44^\circ\text{C}$   
257 at  $T_a = 46^\circ$  and  $48^\circ\text{C}$ , respectively, whereupon they lost their ability to right themselves and  
258 the experiment was terminated immediately. With the exception of  $T_b > 44^\circ\text{C}$  in one roller  
259 individual (with no ill-effects),  $T_b$  remained  $< 44^\circ\text{C}$  in calm rollers and starlings at the  
260 maximum  $T_a$ s. At the highest  $T_a$  shared among the three species ( $46^\circ\text{C}$ ), rollers maintained a  
261 lower  $T_b$  than cuckoos and starlings (Table 1). The mean  $T_a$  at which birds initiated  
262 respiratory EHL mechanisms varied from  $35.9^\circ\text{C}$  in starlings to  $\sim 41^\circ\text{C}$  in cuckoos and rollers,  
263 typically as  $T_b$  approached  $41.5^\circ\text{C}$  in all three species (Table 1). Our observations of the  
264 cuckoos revealed that gaping was always accompanied by gular flutter, which was visibly  
265 evident from the pulsating throat and moving hyoid apparatus. Rollers and starlings panted  
266 while gaping (the gape is wide in rollers) and we did not observe gular flutter (hyoid  
267 movement) in either species.

268



269 *Resting metabolic rate*

270 One cuckoo showed abnormally high RMR values (ranging from 1.03 W at  $T_a = 30^\circ\text{C}$ , to  
271 5.20 W at  $T_a = 50^\circ\text{C}$ , i.e.  $> 6 \times \text{s.d.}$  greater than the mean for the remaining cuckoos), and we  
272 excluded data from this individual from our RMR analyses and descriptive statistics.  
273 Minimum RMR values measured at  $T_a < 35^\circ\text{C}$ , below the respective  $T_{uc}$ s of each species,  
274 varied from  $0.64 \pm 0.20$  W and  $0.69 \pm 0.13$  W in cuckoos and rollers, respectively, to  $1.19 \pm$   
275  $0.31$  W in starlings (Table 1; mass-specific values are provided in supplementary  
276 information, Table S1). In rollers and starlings the  $T_{uc}$  (i.e.,  $T_a$  inflection) ranged from  $31^\circ\text{C}$  in  
277 starlings to  $47.5^\circ\text{C}$  in rollers. No clear inflection point could be identified for cuckoos, and  
278 RMR increased across the entire range of  $T_a$  tested (Fig. 2). In all three species, RMR  
279 increased linearly and significantly at  $T_a > T_{uc}$  (cuckoo,  $t_{1,23}=2.67$ ,  $p<0.05$ ; rollers,  $t_{1,25} = 2.59$ ,  
280  $p<0.05$ ; starlings,  $t_{1,29}=4.13$ ,  $p<0.001$ ) (Fig. 2). Maximum RMR observed at maximum  $T_a$  was  
281 higher in the starlings, with an average of 1.91 W, and lowest in the rollers at  $\sim 1.10$  W.  
282 Maximum RMR was 0.96 W and 2.77 W in two cuckoo individuals, respectively (Table 1).  
283 The average magnitudes of RMR elevations above estimated thermoneutral levels (max.  
284 RMR / min. RMR) were generally below 1.6, with the exception of a single cuckoo that  
285 showed a 3-fold increase in RMR (Table 1). At the highest test  $T_a$  shared among the three  
286 species, RMR was quantitatively similar in cuckoos and rollers, but  $\sim 2$ -fold higher in the  
287 starlings (Table 1).

288

289 *Evaporative water loss*

290 Minimum EWL values measured at  $T_a$ s below the respective  $T_{uc}$  of each species ranged from  
291  $0.48 \pm 0.14$  g h<sup>-1</sup> in cuckoos to  $1.00 \pm 0.67$  g h<sup>-1</sup> in starlings (Table 1; mass-specific values,  
292 TableS1). The inflection  $T_a$  varied by more than 10 °C among the three species; inflection  $T_a$   
293 was  $33.3^\circ\text{C}$  in starlings and greater than  $42^\circ\text{C}$  in cuckoos and rollers (Table 1). Whereas  
294 cuckoos and starlings showed stable EWL rates below their respective inflection  $T_a$ s, rollers  
295 showed a shallow but significant increase in EWL to  $1.65 \pm 0.35$  g h<sup>-1</sup> at  $T_a = 44.7^\circ\text{C}$   
296 ( $t_{1,22}=3.22$ ,  $p<0.01$ ; Fig. 3). Above the inflection  $T_a$  EWL increased linearly and significantly  
297 in all three species (cuckoo,  $t_{1,20}=13.22$ ,  $p<0.001$ ; rollers  $t_{1,33}=11.64$ ,  $p<0.001$ ; starlings,  
298  $t_{1,28}=11.133$ ,  $p<0.001$ ; Fig. 3). Maximum elevations in EWL were around 5-fold ( $>5.5$ -fold in  
299 cuckoos and rollers) above thermoneutral values in all three species (Fig. 3, Table 1).  
300 Whereas rollers showed maximum EHL/MHP ratios exceeding 3 at the maximum  $T_a$ s tested,  
301 cuckoos and starlings generally showed values below 2 (Fig. 4). At the highest shared  $T_a$   
302 cuckoos and rollers showed similar EWL rates and evaporative efficiencies (Table 1). In

303 contrast, starlings showed EWL of  $\sim 3.40 \text{ g h}^{-1}$ , and a slightly lower efficiency compared to  
304 the former species (Table 1).

305

### 306 *Variation in thermoregulation at high air temperatures*

307 The  $T_b$  of cuckoos and doves increased more rapidly compared to rollers and nightjars (95%  
308 CL did not overlap, Fig. 5, Table 2). Starlings showed an intermediate slope of  $T_b$ , with 95%  
309 CL overlapping with most other species. The slope of RMR at  $T_a$  above thermoneutrality was  
310 similar among species, with the exception of nightjars which showed almost no increase in  
311 RMR above  $40^\circ\text{C}$  and no overlap in 95% CL with any of the other species (Fig. 5, Table 2).  
312 The slope of EWL above the inflection  $T_a$  did not differ among cuckoos, starlings and doves,  
313 but was significantly steeper in rollers and significantly shallower in nightjars compared to all  
314 other species (Fig. 5, Table 2). The slopes of EHL/MHP were similar in doves and starlings,  
315 and significantly lower than in all the other species (Fig. 5; Table 2). Nightjars showed a  
316 steeper EHL/MHP slope compared to rollers and cuckoos, yet overlapped marginally with the  
317 95% CL of these species.

318

### 319 **Discussion**

320 All three species studied investigated here showed elevations in  $T_b$ , RMR and EWL at  $T_a >$   
321  $40^\circ\text{C}$ , qualitatively consistent with typical avian patterns. Despite their similarity in  $M_b$ , the  
322 three study species showed substantial variation in patterns of  $T_b$ , RMR and EWL at high  $T_a$ .  
323 The comparatively shallow elevations in RMR in rollers were associated with the highest  
324 evaporative efficiency, and this species tolerated the highest  $T_a$ . Rollers showed very small  
325 elevations in  $T_b$ , associated with high evaporative efficiency. These patterns in rollers are  
326 unexpected since they appear to use panting as the primary EHL pathway. In contrast, at  
327 lower  $T_a$  both starlings and cuckoos showed sharp increases in  $T_b$  and RMR as well as lower  
328 evaporative efficiencies. Yet, the  $T_a$  at which these responses were initiated, patterns of  $T_b$   
329 regulation and EWL elevations were strikingly different among these two species.  
330 Additionally, our five-order comparison reveals that all species, with the exception of  
331 caprimulgids (O'Connor et al., 2017), clearly showed elevated metabolic costs of heat  
332 dissipation (as defined by the slope of RMR above the inflection point) (Fig. 5). These  
333 findings illustrate how little we know about the phylogenetic variation in avian evaporative  
334 cooling pathways, and specifically the functional significance, selective pressures and  
335 evolution of these seemingly diverse pathways for heat tolerance.

336

337 *Body temperature and heat tolerance limits*

338 The mean  $T_b$  of cuckoos at  $T_a$  below 35°C ( $39.8 \pm 0.30^\circ\text{C}$ ) was 1.5°C lower than the mean  
339 active phase  $T_b$  values for Cuculiformes (41.3 °C), but the mean  $T_b$ s of starlings and rollers  
340 were within 0.5°C of the mean values reported for Passeriformes and Coraciiformes,  
341 respectively (Prinzinger et al., 1991). In all three species, the inflection  $T_a$  for  $T_b$  was < 40°C  
342 (Fig. 1). These values are lower than the inflection  $T_a$ s reported for columbids, quail, and  
343 smaller passerines (generally  $T_a \sim 40^\circ\text{C}$ ) (McKechnie et al., 2016a; Smith et al., 2015;  
344 Whitfield et al., 2015). Two species of Caprimulgiform also show a  $T_b$  inflection at  $T_a < 40^\circ\text{C}$   
345 (O'Connor et al., 2017).

346 In calm birds, maximum  $T_b$  was >44.5°C in a cuckoo at  $T_a = 49.6^\circ\text{C}$ , 44.1°C in a  
347 starling at  $T_a = 49.2^\circ\text{C}$  and 44.6°C in a roller at  $T_a = 53^\circ\text{C}$  (Fig. 1). The two cuckoos lost  
348 coordination at  $T_b > 44^\circ\text{C}$ , suggesting this taxon may have lower critical thermal limits than  
349 Passeriformes and Columbiforms, where several species have been shown to tolerate  $T_b >$   
350 45°C (Dawson, 1954; McKechnie et al., 2016a; Smith et al., 2015; Smith et al., 2017;  
351 Whitfield et al., 2015). Several smaller passerines also reached thermal limits as  $T_a$   
352 approached 50°C (McKechnie et al., 2017; Smith et al., 2017; Whitfield et al., 2015)  
353 However,  $T_a = 50^\circ\text{C}$  is probably an underestimation of the heat tolerance limits of cuckoos  
354 and starlings, as we did not reach  $T_a$  at which calm individuals showed a plateau in EWL  
355 accompanied by an increasing  $T_b$  (Whitfield et al., 2015). In contrast to cuckoos and starlings,  
356 rollers defended  $T_b$  over a much larger  $T_a$ - $T_b$  gradient, tolerating  $T_a \approx 56^\circ\text{C}$ , with a mean  $T_b \approx$   
357 43°C (Fig. 1). The  $T_b$  patterns of the coraciiform in our study at  $T_a$  approaching 60°C was  
358 therefore quantitatively similar to the thermoregulatory patterns observed in Columbiformes  
359 (McKechnie et al., 2016a; Smith et al., 2015).

360

361 *Resting metabolic rate*

362 Individual variation in RMR tended to be greater in starlings and rollers compared to  
363 cuckoos. Some of this variation may be explained by the larger  $M_b$  ranges of starlings and  
364 rollers compared with cuckoos, but our data do not allow for a rigorous analyses of the  
365 scaling effects. Nevertheless, within species, individuals showed similar increasing trends in  
366 RMR elevations in slope estimates. The upper inflection  $T_a$  in RMR versus  $T_a$ , i.e., the  $T_{uc}$   
367 indicating increased energetic costs of respiratory EHL, generally occurs at  $T_a < 40^\circ\text{C}$  (Calder  
368 and Schmidt-Nielsen, 1967; Dawson and Bennett, 1973; McNab and Bonaccorso, 1995;  
369 Tieleman and Williams, 2002; Whitfield et al., 2015). In all three species studied here,  $T_{uc}$   
370 was not clearly related to increased efforts of respiratory EHL, unlike the case in Burchell's

371 sandgrouse (McKechnie et al., 2016b). Our data suggest that the initiation of gular flutter or  
372 panting was related to a threshold  $T_b$  of  $\sim 41.5^\circ\text{C}$ , rather than a threshold  $T_a$  (Table 1). The  
373 cuckoos in our study did not show a clear upper inflection  $T_a$ , contrasting with the marked  $T_{uc}$   
374 associated with the onset of gular flutter in Burchell's sandgrouse (*Pterocles burchelli*)  
375 (McKechnie et al., 2016b). At the  $T_a$  value at which we observed cuckoos initiating gular  
376 flutter ( $\sim 42^\circ\text{C}$ , Table 1), RMR had already increased by more than 50% above minimum  
377 resting levels. Similarly, in the starlings, the inflection  $T_a$  for RMR was well below the  $T_a$  at  
378 which this species initiated gaping behaviour, and lower than values in smaller passerines  
379 (Whitfield et al. 2015). The patterns in these two species are perhaps explained by a  $Q_{10}$   
380 effect associated with  $T_b$  elevations, but our small sample sizes precluded us from drawing  
381 any firm conclusions; it is noteworthy that Weathers (1981) showed that, in several  
382 passerines, elevations in  $T_b$  do not affect RMR, but this idea has not been rigorously tested.  
383 In contrast to starlings and cuckoos, rollers maintained a low and stable RMR up to  $T_a = 47^\circ\text{C}$   
384 (Fig. 2), much higher than the  $T_a$  associated with gaping. This suggests that rollers kept  
385 metabolic heat loads low during the initial stages of panting. Our estimate of the upper  $T_{uc}$  in  
386 rollers is thus substantially higher than typically observed in passerines, which also make use  
387 of panting (McKechnie et al., 2017; Weathers, 1981; Whitfield et al., 2015).

388 Our data reveal considerable overlap in the slope of RMR increases above the  $T_{uc}$  in  
389 all three species studied here when compared to a similarly-sized dove (*S. senegalensis*) (Fig.  
390 5, Table 2). The authors of at least one previous study noted that the metabolic costs in  
391 species that pant (e.g. village weavers, *Ploceus cucullatus*) are similar to those in species  
392 which gular fluttering (e.g. Chinese painted quails, *Excalfactoria chinensis*), and additionally  
393 cutaneous EHL [e.g. Inca doves, *Scardafella inca* (Lasiewski and Seymour, 1972)].  
394 However, one striking difference among the species we compare here is that doves and  
395 rollers reached maximum RMR at higher  $T_a$  and maintained lower  $T_b$  compared to cuckoos  
396 and starlings. Fractional elevations in RMR at  $T_a = 50^\circ\text{C}$  compared to thermoneutral values  
397 were as high as 60% in starlings, 25% in cuckoos, and  $\sim 10\%$  in rollers and doves. These  
398 increases fall broadly between values previously reported for passerines [30-90%;  
399 (McKechnie et al., 2017; Whitfield et al., 2015) and columbids ( $\sim 7\%$  (McKechnie et al.,  
400 2016a) over a similar  $T_a$  range ( $30^\circ\text{C}$  to  $50^\circ\text{C}$ ). The lack of metabolic elevations at  $T_a$ s above  
401 those where gular flutter was initiated in the nightjars ( $T_a \sim 40^\circ\text{C}$ ) contrasts strongly with all  
402 the above-mentioned species (Fig. 5). Metabolic rates at high temperature thus seem not  
403 related to the two modes (gular flutter versus panting) these phylogenetically diverse species  
404 employ.

405

406 *Evaporative heat loss*

407 Patterns of EWL followed the typical avian pattern, where EWL is minimal at  $T_a$  around 25-  
408 35°C and increases approximately linearly at  $T_a$ s approaching or exceeding 40°C. The  
409 variation in inflection  $T_a$  and slope of EWL above these inflections is difficult to explain, and  
410 suggests the capacity to dissipate heat evaporatively may vary greatly among taxa of similar  
411 size.

412 Maximum capacity for evaporative cooling, expressed as EHL/MHP, was  
413 qualitatively related to the maximum  $T_a$  reached by our three study species. On average,  
414 cuckoos and starlings evaporated less than 200% of metabolic heat production at the  
415 maximum  $T_a$  reached (Fig. 4) – similar to patterns observed in passerines (McKechnie et al.,  
416 2017; Smith et al., 2017; Whitfield et al., 2015). The comparatively high RMR of starlings  
417 likely constrained their evaporative cooling efficiency as they had to evaporate water almost  
418 twice as rapidly compared to the other species to dissipate 100% of their metabolic heat. This  
419 may have broad-scale implications for heat loss in the order Passeriformes, especially in light  
420 of a recent study demonstrating high basal metabolism in this order (Londoño et al., 2015).  
421 Cuckoos showed a slope of EHL/MHP versus  $T_a$  only marginally shallower than rollers, yet  
422 despite their low RMR at  $T_a < 35^\circ\text{C}$  did not achieve a high evaporative efficiency (Fig. 4);  
423 even though a very calm cuckoo dissipated 200% of its metabolic heat load at  $T_a = 50^\circ\text{C}$ , the  
424  $T_b$  of this individual was already  $\sim 43^\circ\text{C}$ .

425 Rollers showed a mean maximum EHL/MHP of 3.6 ( $> 4$  in one individual) (Fig. 4),  
426 quantitatively similar to values reported in Columbiformes (2.3 - 4.7) (McKechnie et al.,  
427 2016a; Smith et al., 2015). In fact, at  $T_a > 50^\circ\text{C}$  rollers evaporated a greater fraction of  
428 metabolic heat compared to medium-sized columbids (140-g *S. capicola*, and 90-g *S.*  
429 *senegalensis*) occupying the same Kalahari Desert habitat (McKechnie et al., 2016a). This  
430 result is surprising as panting is often argued to be a metabolically costly process compared  
431 to gular flutter (Bartholomew et al., 1962; Whitfield et al., 2015). We suspect the pronounced  
432 heat tolerance in rollers may be functionally linked to the long periods they spend perched in  
433 exposed sites while hunting (Herremans, 2005; Smit et al., 2016). We do not know whether  
434 rollers rely on cutaneous evaporation at high  $T_a$ , although we propose that evaporative  
435 cooling may be enhanced by the large gape of rollers increasing the buccal surface area for  
436 EWL (personal observation); a combination of large gape [ $\sim 15\%$  of skin surface area,  
437 (Cowles and Dawson, 1951)] and high evaporative efficiency also is common to the  
438 caprimulgids, but it would be interesting to investigate the contribution of CEWL to total

439 EWL in rollers. Our understanding of phylogenetic variation in the partitioning of EWL into  
440 cutaneous and respiratory pathways remains very poorly studied, and beside for a few studies  
441 focussing on Columbiformes and Passeriformes (McKechnie and Wolf, 2004; Ro and  
442 Williams, 2010; Tieleman and Williams, 2002; Wolf and Walsberg, 1996), there are limited  
443 empirical data on how increased reliance on CEWL at high  $T_a$  reduces the energetic demands  
444 for respiratory heat dissipation.

445

#### 446 *Preliminary comparisons of phylogenetic variation in thermoregulation under hot conditions*

447 Although our study was not designed to directly quantify gular flutter versus panting in our  
448 study species, our results, combined with those of (Lasiewski and Seymour, 1972), reveal  
449 that the mechanisms of respiratory heat dissipation are not clearly related to evaporative  
450 cooling capacity and tolerance of high  $T_a$ . Even Columbiformes, thought to rely greatly on  
451 cutaneous EHL seem to suffer reductions in evaporative efficiency when they start  
452 incorporating gular flutter or panting mechanisms [e.g., *S. capicola*, and *S. senegalensis*,  
453 (McKechnie et al., 2016a)]. Calder and Schmidt-Nielson (Calder and Schmidt-Nielsen, 1967)  
454 suggested the process of gular flutter may differ among taxa and determine the metabolic  
455 costs of ventilating the buccal cavity. These costs may include processes where the frequency  
456 and amplitude of breathing cycles are in synchrony with gular flutter rates [e.g. Strigiformes,  
457 Columbiformes and Cuculiformes (Bartholomew et al., 1968)], or asynchronous where rapid  
458 gular flutter is accompanied by slow breathing rates [e.g. some Pelicaniformes and some  
459 Caprimulgiformes (Bartholomew et al., 1968; Lasiewski and Bartholomew, 1966; Lasiewski  
460 and Seymour, 1972)]. Bartholomew et al. (1968) further suggested that species maintaining  
461 gular flutter rates asynchronous to breathing rates, such as the poorwill (*Phalaenoptilus*  
462 *nuttalli*), achieve very high evaporative cooling efficiencies compared to species where  
463 breathing is completely synchronised with gular fluttering (probably no more costly than  
464 achieved through panting alone). To the best of our knowledge, the role these different modes  
465 of gular flutter play in the efficiency of EHL has not been further investigated.

466 The phylogenetic variation in modes of avian respiratory EHL pathways is interesting,  
467 and there is no clear explanation for the dichotomy between gular flutter and/or panting  
468 among avian taxa. The prevalence of gular flutter in phylogenetically older taxa, such as  
469 Paleognathae and most basal Neognathae, suggests it is a plesiomorphic trait. This may  
470 indicate that the function of the hyoid bone, which ventilates the gular area, was modified in  
471 some clades of the Neognathae (e.g. Coraciiformes and Passeriformes). Interestingly,

472 Psitticiformes [parrots, closely related to Passeriformes, (Hackett et al., 2008) are the only  
473 avian taxon in which lingual flutter (movement of tongue) is known to supplement panting to  
474 ventilate the buccal area (Bucher, 1981; Bucher, 1985). However, to the best of our  
475 knowledge, no studies have examined whether lingual flutter differs in efficiency from  
476 panting alone.

477 In conclusion, substantial phylogenetic variation exists in avian heat tolerance and  
478 evaporative cooling capacity, an observation reiterated by our comparisons among  
479 representatives of five orders. This variation may have far-reaching implications for the  
480 ecology and evolution of birds that routinely have to maintain  $T_b$  below environmental  
481 temperature. The consequences of this variation for water balance and risk of over-heating  
482 during very hot weather are strikingly illustrated by the observation that, among the species  
483 considered here at  $T_a \sim 50^\circ\text{C}$ , rates of EWL expressed in term of body mass loss vary  $\sim 2$ -fold;  
484 from an equivalent of  $2.3\% M_b \text{ h}^{-1}$  in nightjars to  $4.6\% M_b \text{ h}^{-1}$  in starlings. Moreover, at the  
485 same  $T_a$  the  $T_b$  of starlings is  $\sim 3^\circ\text{C}$  higher than that of nightjars. Quantifying phylogenetic  
486 diversity in avian thermal physiology under hot conditions is critical for testing hypotheses  
487 regarding physiological adaptation, and predicting vulnerability to the higher  $T_a$  and more  
488 frequent and intense heat waves associated with anthropogenic climate change (Albright et  
489 al., 2017). For instance, the 140-fold differences in slopes of RMR and EWL with increasing  
490  $T_a$ , (RMR  $0.0003 \text{ mW } ^\circ\text{C}^{-1}$  in nightjars to  $0.0417 \text{ mW } ^\circ\text{C}^{-1}$  in starlings) and 3.6-fold (EWL  
491  $0.093 \text{ g h}^{-1} ^\circ\text{C}^{-1}$  in nightjars to  $0.337 \text{ g h}^{-1} ^\circ\text{C}^{-1}$  in rollers) suggests that, even within similarly-  
492 sized species, the consequences of the predicted  $4^\circ\text{C}$  increase in extreme  $T_a$  maxima for the  
493 21<sup>st</sup> Century (IPCC, 2007; IPCC, 2011) will vary substantially. The current phylogenetic  
494 sampling of data on avian thermoregulatory responses to heat is poor, and a thorough review  
495 of the functional roles of these mechanisms as determinants of evaporative cooling efficiency  
496 will require sampling more avian taxa from currently unstudied orders.

497

#### 498 **Acknowledgements**

499 The Scholtz and de Bruin families (South Africa) allowed us to conduct this research on their  
500 properties. We also thank Michelle Thompson, Matthew Noakes, Ryan O'Connor, and Mateo  
501 Garcia for assistance in the field and laboratory.

502

#### 503 **Competing interests**

504 The authors declare no competing financial interests.

505

506 **Author contributions**

507 B.O.W., A.E.M. and B.S. designed the study. M.C.W., B.S., W.A.T. and B.O.W. collected  
508 data, B.S. and A.R.G. analysed the data. B.S. wrote the manuscript.

509

510 **Funding**

511 This material is based on work supported by the National Science Foundation under IOS-  
512 1122228 to B. O. Wolf. Any opinions, findings and conclusions or recommendations  
513 expressed in this material are those of the author(s) and do not necessarily reflect the views of  
514 the National Science Foundation.

515

516 **Abbreviations**

517 CEWL cutaneous evaporative water loss

518 EHL evaporative heat loss

519 EWL evaporative water loss

520  $M_b$  body mass

521 MHP metabolic heat production

522 RMR Resting metabolic rate

523 CL confidence limit

524  $T_a$  air temperature

525  $T_b$  body temperature

526  $\dot{V}_{CO_2}$  carbon dioxide production

527  $\dot{V}_{O_2}$  oxygen consumption

528

529

530 **References**

531 **Albright, T. P., Mutiibwa, D., Gerson, A. R., Smith, E. K., Talbot, W. A., O'Neill, J. J.,**

532 **McKechnie, A. E. and Wolf, B. O.** (2017). Mapping evaporative water loss in desert  
533 passerines reveals an expanding threat of lethal dehydration. *Proc. Natl. Acad. Sci.* **114**,  
534 2283–2288.

535 **Bartholomew, G. A. and Cade, T. J.** (1963). The water economy of land birds. *Auk* **80**,  
536 504–539.

537 **Bartholomew, G. A., Hudson, J. W. and Howell, T. R.** (1962). Body temperature, oxygen  
538 consumption, evaporative water loss, and heart rate in the poor-will. *Condor* **64**, 117–



- 539 125.
- 540 **Bartholomew, G. A., Lasiewski, R. C. and Crawford, E. C.** (1968). Patterns of panting and  
541 gular flutter in cormorants, pelicans, owls, and doves. *Condor* **70**, 31–34.
- 542 **Bucher, T. L.** (1981). Oxygen consumption, ventilation and respiratory heat loss in a  
543 parrot, *Bolborhynchus lineola*, in relation to ambient temperature. *J. Comp. Physiol.* **142**,  
544 479–488.
- 545 **Bucher, T. L.** (1985). Ventilation and oxygen consumption in *Amazona viridigenalis*: a  
546 reappraisal of “resting” respiratory parameters in birds. *J. Comp. Physiol.* **155**, 269–276.
- 547 **Calder, W. A. and Schmidt-Nielsen, K.** (1967). Temperature regulation and evaporation in  
548 the pigeon and the roadrunner. *Am. J. Physiol.* **213**, 883–889.
- 549 **Cowles, R. B. and Dawson, W. R.** (1951). A cooling mechanism of the Texas nighthawk.  
550 *Condor* **53**, 19–22.
- 551 **Danner, R. M., Gulson-Castillo, E. R., James, H. F., Dzielski, S. A., Frank, D. C.,**  
552 **Sibbald, E. T. and Winkler, D. W.** (2016). Habitat-specific divergence of air  
553 conditioning structures in bird bills. *Auk* **134**, 65–75.
- 554 **Dawson, W. R.** (1954). Temperature regulation and water requirements of the brown and  
555 Abert towhees, *Pipilo fuscus* and *Pipilo aberti*. In *University of California Publications*  
556 *in Zoology* (ed. Bartholomew, G. A., Crescitelli, F., Bullock, T. H., Furgason, W. H.,  
557 and Schechtman, A. M.), pp. 81–123. Berkeley: University of California Press.
- 558 **Dawson, W. R.** (1958). Relation of Oxygen Consumption and Evaporative Water Loss to  
559 Temperature in the Cardinal. *Physiol. Zool.* **31**, 37–48.
- 560 **Dawson, W. R. and Bartholomew, G. A.** (1968). Temperature regulation and water  
561 economy of desert birds. In *Desert biology* (ed. Brown, G. W.), p. New York: Academic  
562 Press.
- 563 **Dawson, W. R. and Bennett, A. F.** (1973). Roles of metabolic level and temperature  
564 regulation in the adjustment of western plumed pigeons (*Lophophaps ferruginea*) to  
565 desert conditions. *Comp. Biochem. Physiol.* **44A**, 249–266.
- 566 **du Plessis, K. L., Martin, R. O., Hockey, P. A. R., Cunningham, S. J. and Ridley, A. R.**  
567 (2012). The costs of keeping cool in a warming world: implications of high temperatures  
568 for foraging, thermoregulation and body condition of an arid-zone bird. *Glob. Chang.*  
569 *Biol.* **18**, 3063–3070.
- 570 **Gerson, A. R., Smith, E. K., Smit, B., McKechnie, A. E. and Wolf, B. O.** (2014). The  
571 impact of humidity on evaporative cooling in small desert birds exposed to high air  
572 temperatures. *Physiol. Biochem. Zool.* **87**, 782–795.

- 573 **Hackett, S. J., Kimball, R. T., Reddy, S., Bowie, R. C. K., Braun, E. L., Braun, M. J.,**  
574 **Chojnowski, J. L., Cox, W. A., Han, K.-L., Harshman, J., et al.** (2008). A  
575 phylogenomic study of birds reveals their evolutionary history. *Science* (80- ). **320**,  
576 1763–1768.
- 577 **Herremans, M. L. J.** (2005). Lilac-breasted Roller. In *Roberts Birds of Southern Africa*  
578 *VIIIth Edition* (ed. Hockey, P. A. R., Dean, W. R. J., and Ryan, P. G.), p. Cape Town:  
579 The Trustees of the John Voelcker Bird Book Fund.
- 580 **IPCC** (2007). *Climate change 2007: Fourth assessment report of the Intergovernmental*  
581 *Panel on Climate Change*. Cambridge: Cambridge University Press.
- 582 **IPCC** (2011). *Intergovernmental Panel on Climate Change special report on managing the*  
583 *risks of extreme events and disasters to advance climate change adaptation*. Cambridge:  
584 Cambridge University Press.
- 585 **Lasiewski, R. C. and Bartholomew, G. A.** (1966). Evaporative cooling in the poor-will and  
586 the tawny frogmouth. *Condor* **68**, 253–262.
- 587 **Lasiewski, R. C. and Seymour, R. S.** (1972). Thermoregulatory responses to heat stress in  
588 four species of birds weighing approximately 40 grams. *Physiol. Zool.* **45**, 106–118.
- 589 **Lasiewski, R. C., Acosta, A. L. and Bernstein, M. H.** (1966). Evaporative water loss in  
590 birds - I. Characteristics of the open flow method of determination, and their relation to  
591 estimates of thermoregulatory ability. *Comp. Biochem. Physiol.* **19**, 445–457.
- 592 **Londoño, G. A., Chappell, M. A., del Rosario Castañeda, M., Jankowski, J. E. and**  
593 **Robinson, S. K.** (2015). Basal metabolism in tropical birds: latitude, altitude, and the  
594 “pace of life”. *Funct. Ecol.* **29**, 338–346.
- 595 **McKechnie, A. E. and Wolf, B. O.** (2004). Partitioning of evaporative water loss in white-  
596 winged doves: plasticity in response to short-term thermal acclimation. *J. Exp. Biol.* **207**,  
597 203–210.
- 598 **McKechnie, A. E. and Wolf, B. O.** (2010). Climate change increases the likelihood of  
599 catastrophic avian mortality events during extreme heat waves. *Biol. Lett.* **6**, 253–256.
- 600 **McKechnie, A. E., Whitfield, M. C., Smit, B., Gerson, A. R., Smith, E. K., Talbot, W. A.,**  
601 **McWhorter, T. J. and Wolf, B. O.** (2016a). Avian thermoregulation in the heat:  
602 efficient evaporative cooling allows for extreme heat tolerance in four southern  
603 Hemisphere columbids. *J. Exp. Biol.* **219**, 2145–2155.
- 604 **McKechnie, A. E., Smit, B., Whitfield, M. C., Noakes, M. J., Talbot, W. A., Garcia, M.,**  
605 **Gerson, A. R. and Wolf, B. O.** (2016b). Avian thermoregulation in the heat:  
606 evaporative cooling capacity in an archetypal desert specialist, Burchells sandgrouse

- 607           (*Pterocles burchelli*). *J. Exp. Biol.* **219**, 2137.
- 608 **McKechnie, A. E., Gerson, A. R., McWhorter, T. J., Smith, E. K., Talbot, W. A. and**  
609 **Wolf, B. O.** (2017). Avian thermoregulation in the heat: evaporative cooling in five  
610 Australian passerines reveals within-order biogeographic variation in heat tolerance. *J.*  
611 *Exp. Biol.* **220**, 2436–2444.
- 612 **McNab, B. K. and Bonaccorso, F. J.** (1995). The energetics of Australasian swifts,  
613 frogmouths and nightjars. *Physiol. Zool.* **68**, 245–261.
- 614 **Muggeo, V. M. R.** (2009). Segmented: an R package to fit regression models with broken-  
615 line relationships.
- 616 **Noakes, M. J., Wolf, B. O. and McKechnie, A. E.** (2016). Seasonal and geographical  
617 variation in heat tolerance and evaporative cooling capacity in a passerine bird. *J. Exp.*  
618 *Biol.* **219**, 859–869.
- 619 **O’Connor, R. S., Wolf, B. O., Brigham, R. M. and McKechnie, A. E.** (2017). Avian  
620 thermoregulation in the heat: efficient evaporative cooling in two southern African  
621 nightjars. *J. Comp. Physiol. B* **187**, 477–491.
- 622 **Pinheiro, J., Bates, D., DebRoy, S., Sarkar, D. and RDevelopmentCoreTeam** (2009).  
623 nlme: Linear and nonlinear mixed effects models. R package version 3.1-94.
- 624 **Prinzinger, R., Preßmar, A. and Schleucher, E.** (1991). Body temperature in birds. *Comp.*  
625 *Biochem. Physiol.* **99A**, 499–506.
- 626 **Ro, J. and Williams, J. B.** (2010). Respiratory and cutaneous water loss of temperate-zone  
627 passerine birds. *Comp. Biochem. Physiol. A* **156**, 237–246.
- 628 **Smit, B., Harding, C. T., Hockey, P. A. R. and McKechnie, A. E.** (2013). Adaptive  
629 thermoregulation during summer in two populations of an arid-zone passerine. *Ecology*  
630 **94**, 1142–1154.
- 631 **Smit, B., Zietsman, G., Martin, R. O., Cunningham, S. J., McKechnie, A. E. and**  
632 **Hockey, P. A. R.** (2016). Behavioural responses to heat in desert birds: implications for  
633 predicting vulnerability to climate warming. *Clim. Chang. Responses* **3**, 9.
- 634 **Smith, E. K., O’Neill, J., Gerson, A. R. and Wolf, B. O.** (2015). Avian thermoregulation in  
635 the heat: resting metabolism, evaporative cooling and heat tolerance in Sonoran Desert  
636 doves and quail. *J. Exp. Biol.* **218**, 3636–3646.
- 637 **Smith, E. K., O’Neill, J. J., Gerson, A. R., McKechnie, A. E. and Wolf, B. O.** (2017).  
638 Avian thermoregulation in the heat: resting metabolism, evaporative cooling and heat  
639 tolerance in Sonoran Desert songbirds. *J. Exp. Biol.* **220**, 3290–3300.
- 640 **Talbot, W. A., McWhorter, T. J., Gerson, A. R., McKechnie, A. E. and Wolf, B. O.**

- 641 (2017). Avian thermoregulation in the heat: evaporative cooling capacity of arid-zone  
642 Caprimulgiformes from two continents. *J. Exp. Biol.* **220**, 3488 LP-3498.
- 643 **Tattersall, G. J., Andrade, D. V and Abe, A. S.** (2009). Heat exchange from the toucan bill  
644 reveals a controllable vascular thermal radiator. *Science (80-. )*. **325**, 468–470.
- 645 **Tieleman, B. I. and Williams, J. B.** (2000). The adjustment of avian metabolic rates and  
646 water fluxes to desert environments. *Physiol. Biochem. Zool.* **73**, 461–479.
- 647 **Tieleman, B. I. and Williams, J. B.** (2002). Cutaneous and respiratory water loss in larks  
648 from arid and mesic environments. *Physiol. Biochem. Zool.* **75**, 590–599.
- 649 **Tieleman, B. I., Williams, J. B. and Bloomer, P.** (2003). Adaptation of metabolic rate and  
650 evaporative water loss along an aridity gradient. *Proc. R. Soc. London* **270**, 207–214.
- 651 **Tracy, C. R., Welch, W. R., Pinshow, B. and Porter, W. P.** (2010). *Properties of air: a*  
652 *manual for use in biophysical ecology, 4th edn.* Madison, WI.
- 653 **van de Ven, T. M. F. N., Martin, R. O., Vink, T. J. F., McKechnie, A. E. and**  
654 **Cunningham, S. J.** (2016). Regulation of heat exchange across the hornbill beak:  
655 functional similarities with toucans? *PLoS One* **11**, e0154768.
- 656 **Weathers, W. W.** (1981). Physiological thermoregulation in heat-stressed birds:  
657 consequences of body size. *Physiol. Zool.* **54**, 345–361.
- 658 **Whitfield, M. C., Smit, B., McKechnie, A. E. and Wolf, B. O.** (2015). Avian  
659 thermoregulation in the heat: scaling of heat tolerance and evaporative cooling capacity  
660 in three southern African arid-zone passerines. *J. Exp. Biol.* **218**, 1705–1714.
- 661 **Wolf, B. O. and Walsberg, G. E.** (1996). Respiratory and cutaneous evaporative water loss  
662 at high environmental temperatures in a small bird. *J. Exp. Biol.* **199**, 451–457.
- 663
- 664

665 **Tables:**

666 Table 1: Physiological variables (mean  $\pm$  s.d., n) related to thermoregulation at the air  
 667 temperature ( $T_a$ ) range we tested African cuckoo (*Cuculus gularis*; cuckoo), lilac-breasted  
 668 roller (*Coracias caudatus*; roller), and Burchell's starling (*Lamprotornis australis*; starling).  
 669 Minimum values represent lowest value for each individual at  $T_a < 35^\circ\text{C}$ , or the upper critical  
 670 limit of thermoneutrality ( $T_{uc}$ ) for each species. Maximum values were obtained at the  
 671 highest  $T_a$  tested; when  $n < 3$ , we also show average values at the second highest  $T_a$  tested. We  
 672 further indicate mean values for the highest  $T_a$  ( $n \geq 3$ ), i.e.  $T_a = 46^\circ\text{C}$ , shared by the three  
 673 species.

| <b>Physiological variable</b>                                | <b>cuckoo</b>         | <b>roller</b>         | <b>starling</b>       |
|--------------------------------------------------------------|-----------------------|-----------------------|-----------------------|
| Body mass (g)                                                | 110.00 $\pm$ 0.02 (5) | 94.50 $\pm$ 8.50      | 109.10 $\pm$ 9.30 (5) |
| <b>Body temperature (<math>T_b</math>)</b>                   |                       |                       |                       |
| Minimum $T_b$ ( $^\circ\text{C}$ )                           | 40.04 $\pm$ 0.57 (6)  | 40.69 $\pm$ 0.82 (11) | 40.65 $\pm$ 0.75 (5)  |
| Inflection $T_a$ ( $^\circ\text{C}$ )                        | 32.8                  | 36.7                  | 34.2                  |
| $T_b$ vs $T_a$ slope                                         | 0.2790                | 0.1613                | 0.1843                |
| Maximum $T_b$ ( $^\circ\text{C}$ )                           | 44.0 (2)              | 43.58 $\pm$ 0.84 (5)  | 42.81 $\pm$ 1.03 (3)  |
|                                                              | 43.7 (2)              | 43.40 $\pm$ 0.68 (2)  | 43.18 (2)             |
| Maximum $T_a$ ( $^\circ\text{C}$ )                           | 48 (2)                | 54 (5)                | 48 (3)                |
|                                                              | 50 (2)                | 56 (2)                | 50 (2)                |
| $T_b$ at onset of panting/gular flutter ( $^\circ\text{C}$ ) | 41.56 $\pm$ 0.57 (5)  | 41.31 $\pm$ 0.53 (9)  | 41.46 $\pm$ 0.23 (5)  |
| $T_a$ at onset of panting/gular flutter ( $^\circ\text{C}$ ) | 40.89 $\pm$ 0.79 (5)  | 41.18 $\pm$ 1.94 (9)  | 35.92 $\pm$ 4.45 (5)  |
| <b>Resting metabolic rate (RMR)</b>                          |                       |                       |                       |
| Minimum RMR (W)                                              | 0.643 $\pm$ 0.198 (5) | 0.69 $\pm$ 0.13 (8)   | 1.189 $\pm$ 0.311 (5) |
| $T_{uc}$ ( $^\circ\text{C}$ )                                | na                    | 47.5                  | 31                    |
| RMR slope (mW $^\circ\text{C}^{-1}$ )                        | 0.0224                | 0.0396                | 0.0417                |
| Maximum RMR (W)                                              | 2.773 (1)             | 1.00 $\pm$ 0.24 (4)   | 1.538 $\pm$ 0.215 (3) |
|                                                              | 0.955 (1)             | 1.07 $\pm$ 0.17 (2)   | 1.913 (2)             |
| Max. RMR / Min. RMR                                          | 3.06 (1)              | 1.45 (4)              | 1.29 (3)              |
|                                                              | 1.24 (1)              | 1.55 (2)              | 1.61 (2)              |
| <b>Evaporative water loss (EWL)</b>                          |                       |                       |                       |
| Minimum EWL (g $\text{h}^{-1}$ )                             | 0.481 $\pm$ 0.144 (6) | 0.85 $\pm$ 0.38 (8)   | 1.00 $\pm$ 0.67       |
| Inflection $T_a$ ( $^\circ\text{C}$ )                        | 42.7                  | 44.7                  | 33.3                  |
| EWL slope (g $\text{h}^{-1} \text{ }^\circ\text{C}^{-1}$ )   | 0.2383                | 0.3370                | 0.2306                |
| Maximum EWL (g $\text{h}^{-1}$ )                             | 2.72 (2)              | 4.81 $\pm$ (4)        | 3.33 $\pm$ 0.51 (3)   |
|                                                              | 3.09 (2)              | 5.41 $\pm$ (2)        | 4.97 (2)              |
| Max. EWL / Min. EWL                                          | 5.66 (2)              | 5.66 (4)              | 3.33 (3)              |
|                                                              | 6.57 (2)              | 6.36 (2)              | 4.97 (2)              |
| Minimum EHL/MHP                                              | 0.382 $\pm$ 0.157 (5) | 0.72 $\pm$ 0.43 (8)   | 0.29 $\pm$ 0.29       |
| Maximum EHL/MHP                                              | 0.80 (1)              | 3.35 $\pm$ 0.75 (4)   | 1.70 $\pm$ 0.280 (3)  |
|                                                              | 2.13 (1)              | 3.48 $\pm$ 0.85 (2)   | 1.90 (2)              |
| EHL/MHP vs $T_a$ slope                                       | 0.1590                | 0.1709                | 0.0704                |

*Shared  $T_a = 46^\circ\text{C}$*

|                            |                       |                       |                       |
|----------------------------|-----------------------|-----------------------|-----------------------|
| $T_b$ ( $^\circ\text{C}$ ) | $43.00 \pm 0.95$ (5)  | $41.96 \pm 1.30$ (8)  | $42.61 \pm 0.36$ (4)  |
| RMR (W)                    | $0.857 \pm 0.111$ (4) | $0.830 \pm 0.333$ (8) | $1.700 \pm 0.378$ (4) |
| EWL ( $\text{g hr}^{-1}$ ) | $1.88 \pm 0.28$ (5)   | $1.86 \pm 0.38$ (8)   | $3.40 \pm 1.15$ (4)   |
| EHL/MHP (W)                | $1.49 \pm 0.24$ (4)   | $1.57 \pm 0.32$ (8)   | $1.31 \pm 0.20$ (4)   |

---

674

675

676

Table 2: Slopes and upper and lower 95% confidence intervals (CI) for African cuckoos (cuckoo; *Cuculus gularis*, this study), Lilac-breasted rollers (roller; *Coracias caudatus*, this study), Burchell's starlings (starling; *Lamprotornis australis*, this study), laughing doves [dove; *Spilopelia senegalensis* (McKechnie et al., 2016a)], and Freckled nightjars [nightjar; *Caprimulgis tristigma* (O'Connor et al., 2017)] derived from linear mixed effects models. Non-overlapping 95% CI are indicated by different symbols.

| Species  | RMR<br>(mW °C <sup>-1</sup> )         | EWL<br>(g h <sup>-1</sup> °C <sup>-1</sup> ) | EHL/MHP<br>(mW/°C <sup>-1</sup> )    | T <sub>b</sub><br>(°C °C <sup>-1</sup> ) |
|----------|---------------------------------------|----------------------------------------------|--------------------------------------|------------------------------------------|
| Cuckoo   | 0.0224 [0.0059, 0.0389] <sup>a</sup>  | 0.2383 [0.2030, 0.2736] <sup>a</sup>         | 0.1590 [0.1041, 0.2139] <sup>a</sup> | 0.2790 [0.2408, 0.3172] <sup>a,b</sup>   |
| Roller   | 0.0396 [0.0096, 0.0696] <sup>a</sup>  | 0.3370 [0.2802, 0.3938] <sup>b</sup>         | 0.1709 [0.1342, 0.2076] <sup>a</sup> | 0.1613 [0.1353, 0.1874] <sup>c,d</sup>   |
| Starling | 0.0417 [0.0220, 0.0613] <sup>a</sup>  | 0.2306 [0.1900, 0.2712] <sup>a</sup>         | 0.0704 [0.0610, 0.0798] <sup>b</sup> | 0.1843 [0.1375, 0.2311] <sup>b,c,d</sup> |
| Dove     | 0.0382 [0.0190, 0.0574] <sup>a</sup>  | 0.1999 [0.1583, 0.2415] <sup>a</sup>         | 0.0803 [0.0687, 0.0919] <sup>b</sup> | 0.2367 [0.1920, 0.2814] <sup>a,b</sup>   |
| Nightjar | 0.0003 [-0.0015, 0.0021] <sup>b</sup> | 0.093 [0.0812, 0.1048] <sup>c</sup>          | 0.224 [0.2044, 0.2436] <sup>a</sup>  | 0.151 [0.1334, 0.1687] <sup>d</sup>      |

### Figure legends:

Figure 1: **Body temperature ( $T_b$ ) in African cuckoos (*Cuculus gularis*; n=6), lilac-breasted rollers (*Coracias caudatus*; n=10), and Burchell's starlings (*Lamprotornis australis*; n=7) as a result of air temperature ( $T_a$ ).** The trendlines represent relationships between  $T_b$  and  $T_a$  above an upper inflection  $T_a$  (see methods). The slopes and intercepts were calculated using linear mixed-effects models. Significant relationships are represented by asterisks: \* =  $p < 0.05$ , \*\* =  $p < 0.01$ , \*\*\* =  $p < 0.001$ .

Figure 2: **Resting metabolic rate (RMR) in African cuckoos (*Cuculus gularis*; n=5), lilac-breasted rollers (*Coracias caudatus*; n=10), and Burchell's starlings (*Lamprotornis australis*; n=7) as a result of air temperature ( $T_a$ ).** The trendlines represent relationships between  $T_b$  and  $T_a$  above an upper inflection  $T_a$  (see methods). The slopes and intercepts were calculated using linear mixed-effects models. Significant relationships are represented by asterisks: \* =  $p < 0.05$ , \*\* =  $p < 0.01$ , \*\*\* =  $p < 0.001$ .

Figure 3: **Evaporative water loss (EWL) in African cuckoos (*Cuculus gularis*; n=6), lilac-breasted rollers (*Coracias caudatus*; n=10), and Burchell's starlings (*Lamprotornis australis*; n=7) as a result of air temperature ( $T_a$ ).** The trendlines represent relationships between  $T_b$  and  $T_a$  above an upper inflection  $T_a$  (see methods). The slopes and intercepts were calculated using linear mixed-effects models. For lilac-breasted rollers two significant relationships are shown ( $25\text{ }^\circ\text{C} < T_a < 44.7\text{ }^\circ\text{C}$ ; and  $T_a > 44.7\text{ }^\circ\text{C}$ ). Significant relationships are represented by asterisks: \* =  $p < 0.05$ , \*\* =  $p < 0.01$ , \*\*\* =  $p < 0.001$ .

Figure 4: **Ratio of evaporative heat loss (EHL) to metabolic heat production (MHP) in African cuckoos (*Cuculus gularis*; n=6), lilac-breasted rollers (*Coracias caudatus*; n=10), and Burchell's starlings (*Lamprotornis australis*; n=7) as a result of air temperature ( $T_a$ ).** The trendlines represent relationships between  $T_b$  and  $T_a$  above an upper inflection  $T_a$  (see methods). The slopes and intercepts were calculated using linear mixed-effects models. Significant relationships are represented by asterisks: \* =  $p < 0.05$ , \*\* =  $p < 0.01$ , \*\*\* =  $p < 0.001$ .

**Figure 5: Physiological responses as a result of temperature in five desert species making use of varying modes of respiratory heat dissipation.** These include African cuckoos (cuckoo; *Cuculus gularis*, this study) and laughing doves [dove; *Spilopelia senegalensis* (McKechnie et al. 2016a)] make use of gular flutter probably synchronised with panting. Lilac-breasted rollers (roller; *Coracias caudatus*, this study) and Burchell's starlings (starling; *Lamprotornis australis*, this study) make use of panting only. Freckled nightjars [nightjar; *Caprimulgis tristigma* (O'Connor et al., 2017)] make use of rapid gular, but probably asynchronously to breathing rates. The slopes and 95% confidence levels of the relationship for each species are displayed in Table 2).



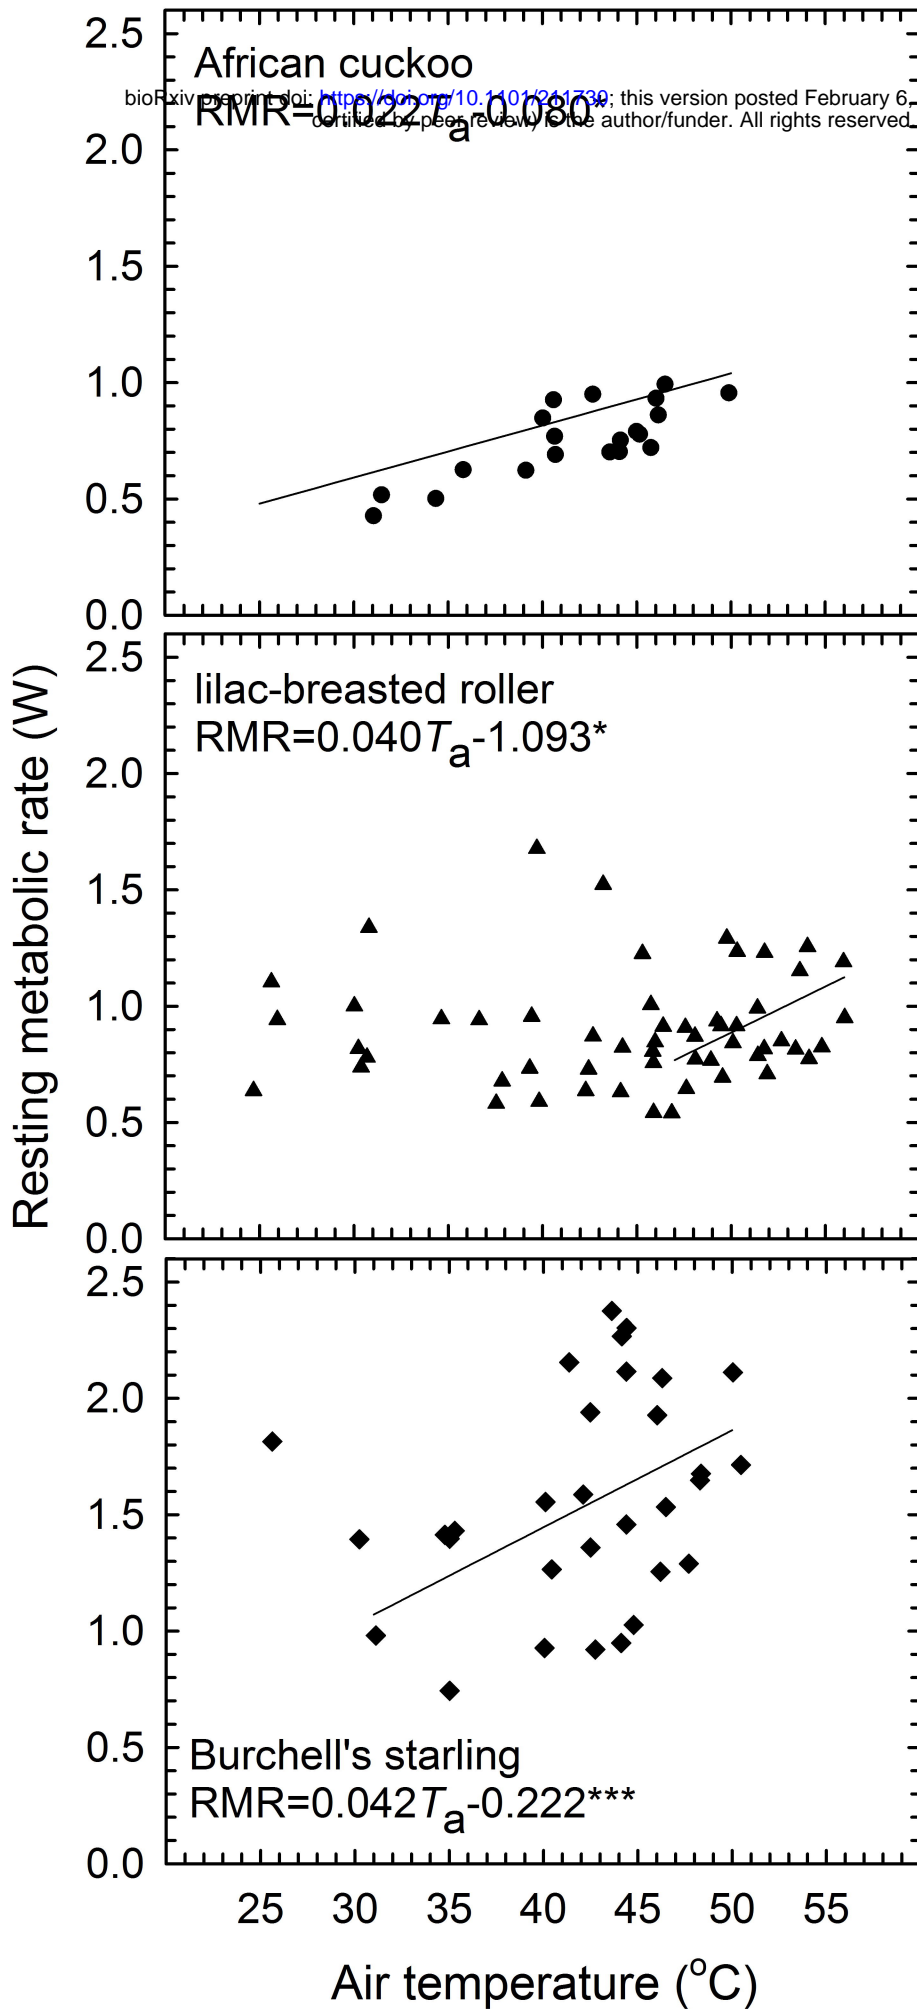

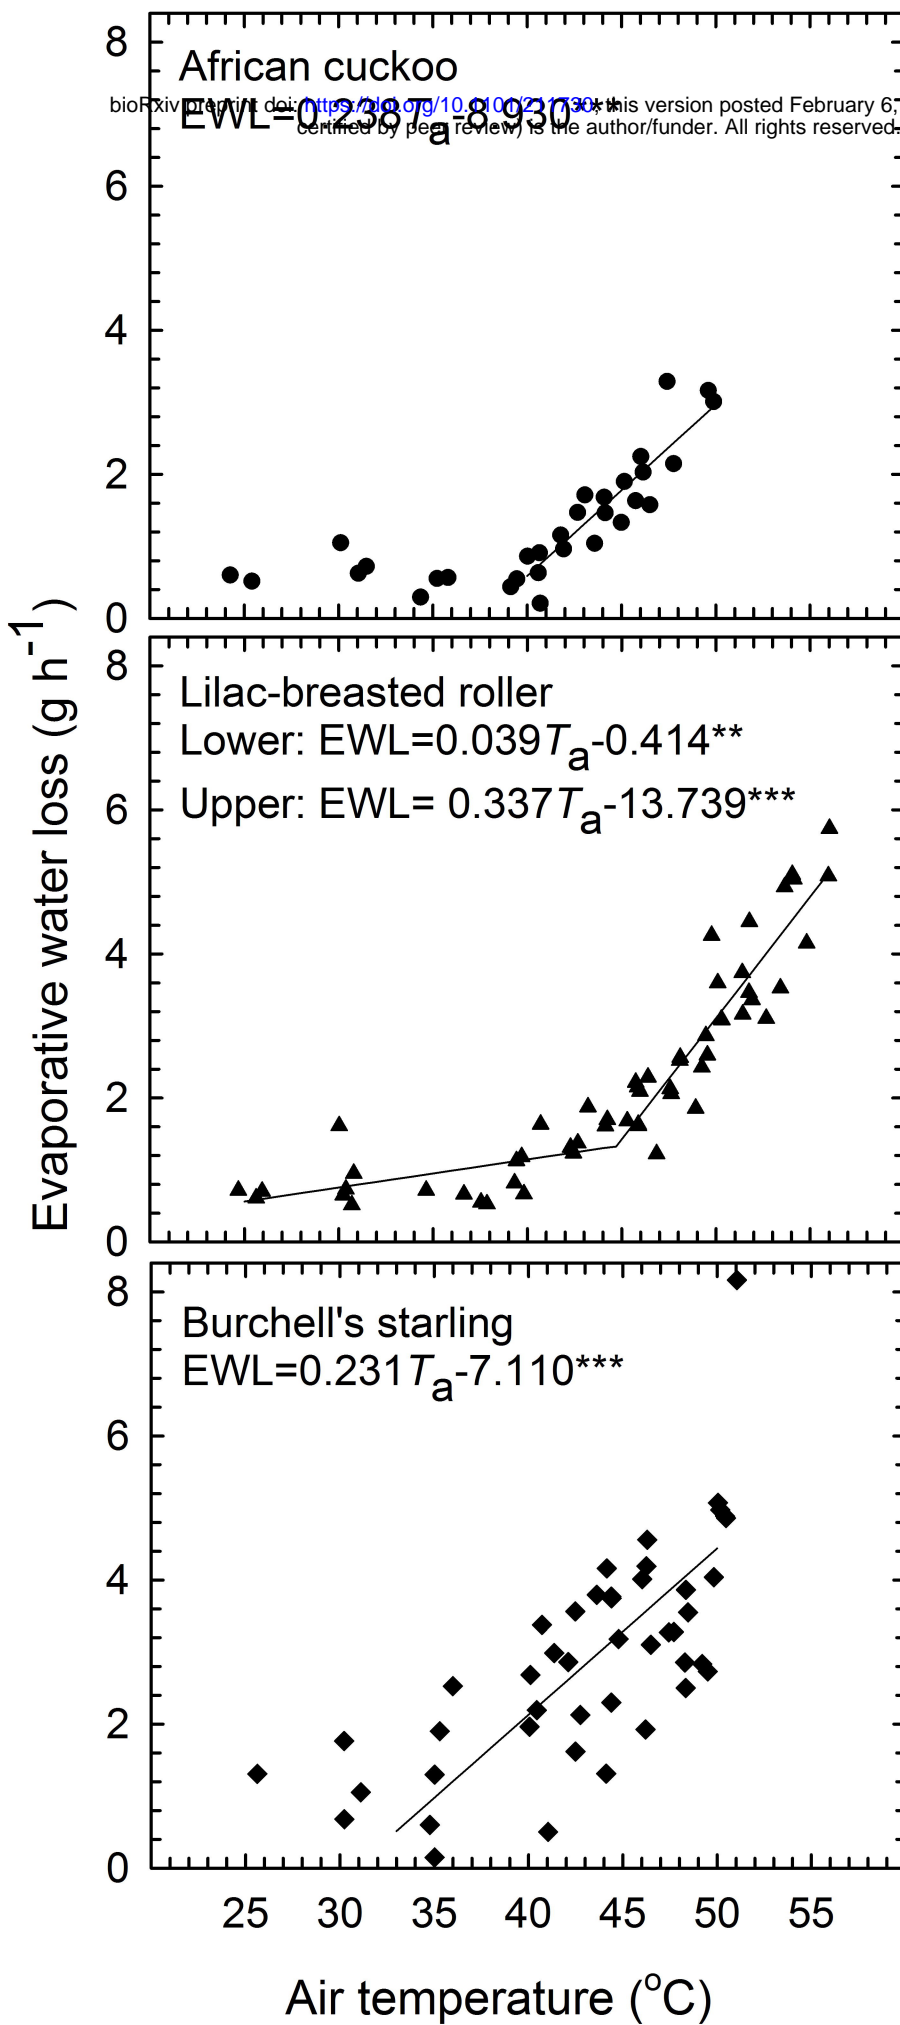

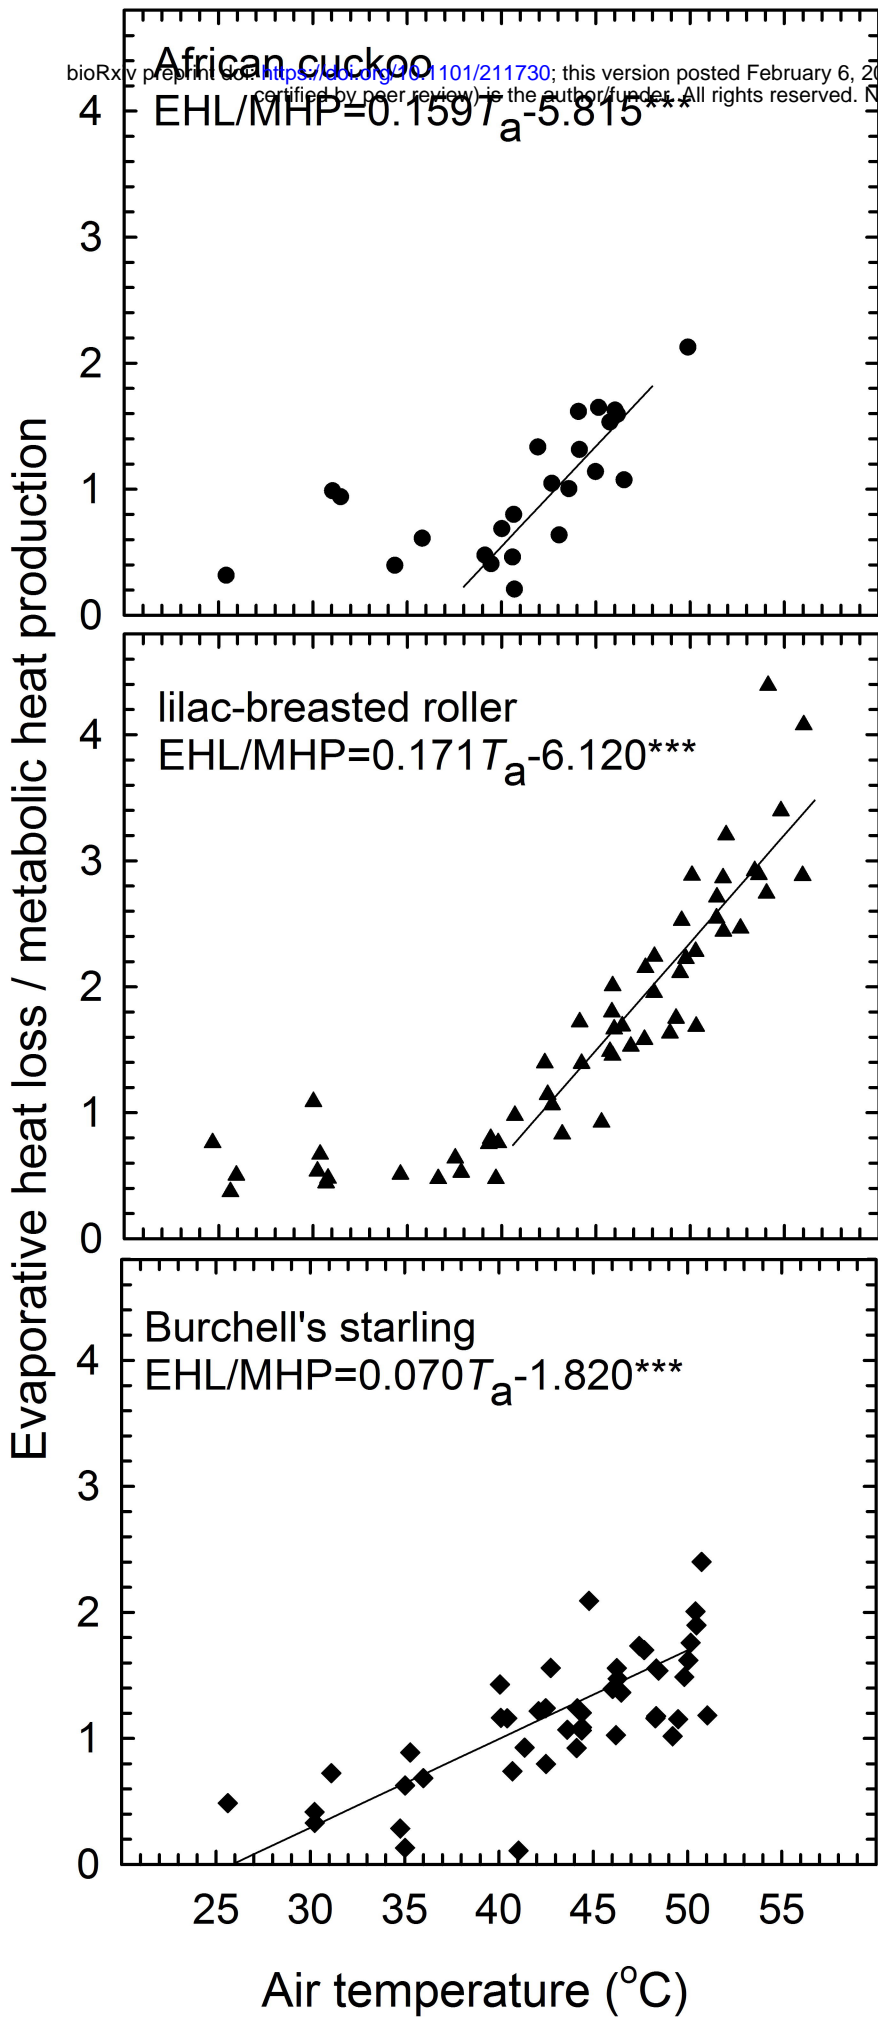

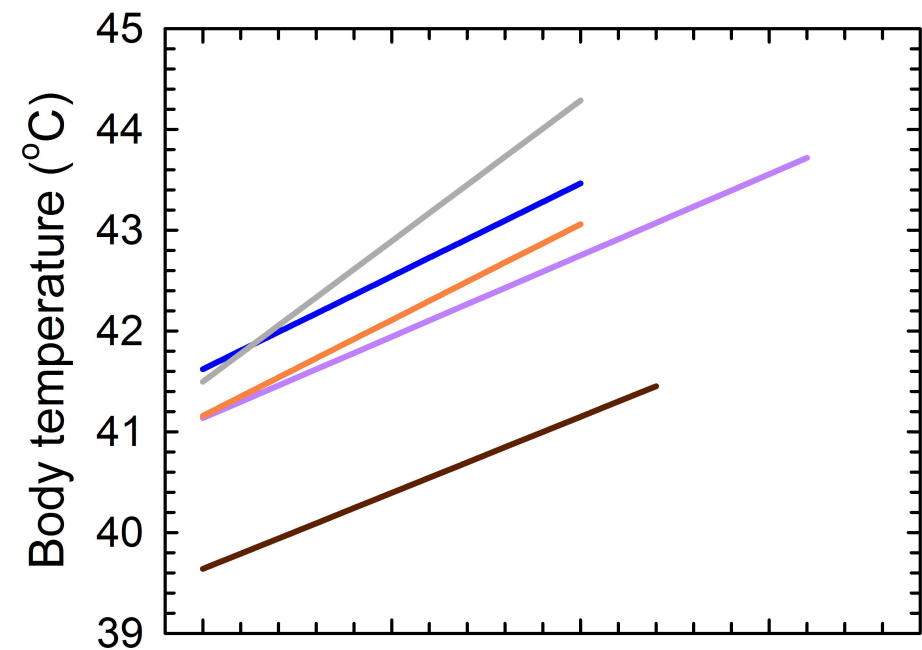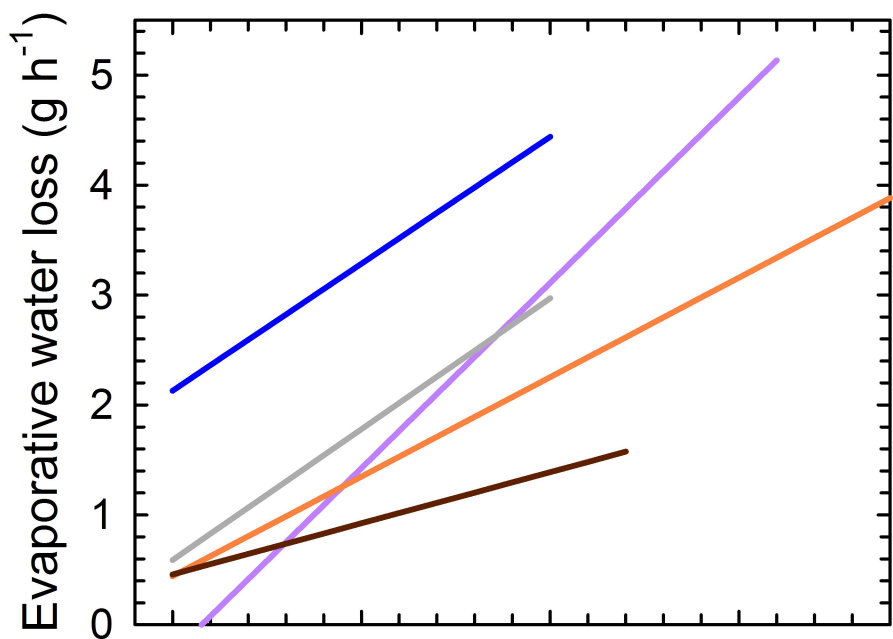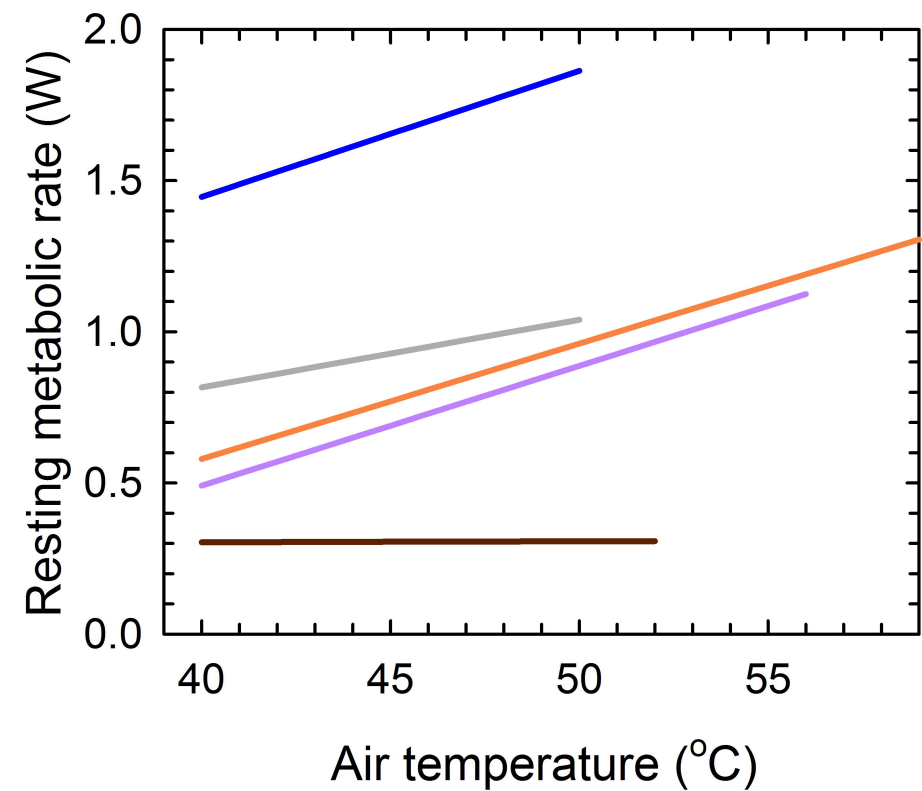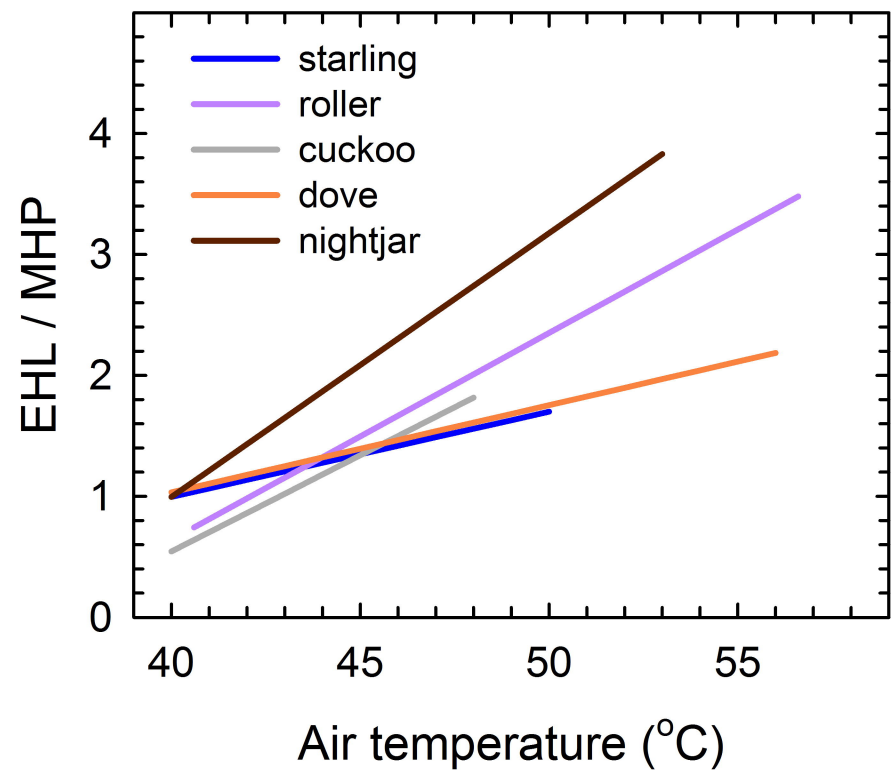

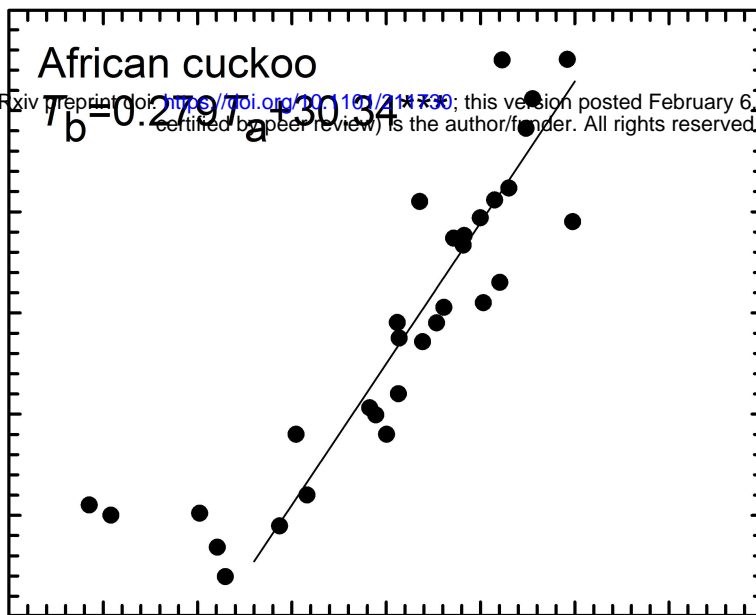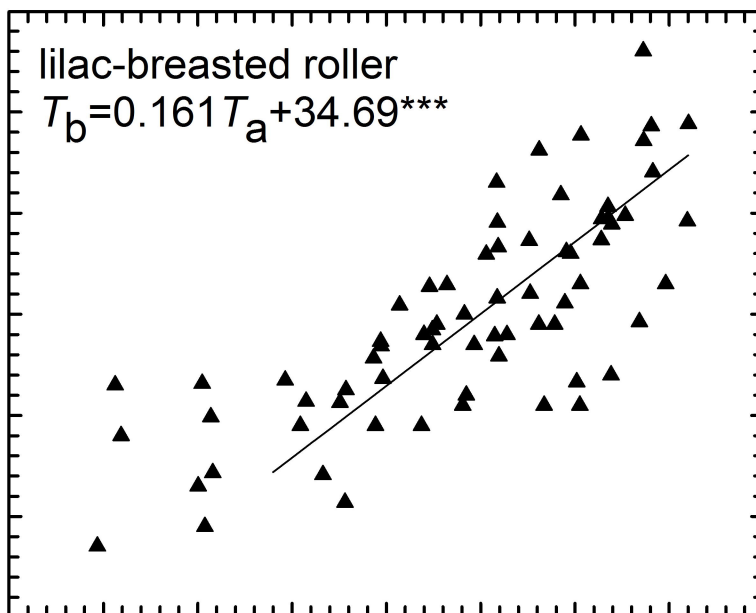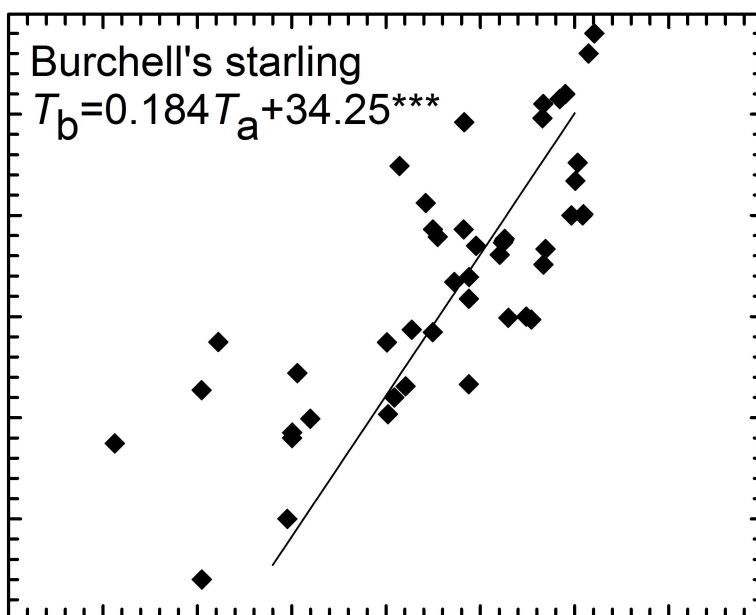

Body temperature (°C)

Air temperature (°C)
